# Supplementary material for: N-glycosylation is a potent regulator of prion protein neurotoxicity
Source: PubMed Central journal article supplement (PMC10469999; doi:10.1016/j.jbc.2023.105101), 2023-07-27
Supplement: mmc1.pdf [file mmc1.pdf]

## N-Glycosylation is a Potent Regulator of Prion Protein Neurotoxicity

Kevin M. Schilling<sup>a</sup>, Pooja Jorwal<sup>b</sup>, Natalia C. Ubilla-Rodriguez<sup>a</sup>, Tufa E. Assafa<sup>a</sup>, Jean R. P. Gatdula<sup>b</sup>, Janelle Vultaggio<sup>b</sup>, David A. Harris<sup>\*b</sup>, and Glenn L. Millhauser<sup>\*a</sup>

<sup>a</sup> 1156 High Street. Department of Chemistry and Biochemistry, University of California, Santa Cruz, CA, 95064, United States

<sup>b</sup> 72 E. Concord St. Department of Biochemistry, Boston University, Chobanian & Avedisian School of Medicine, Boston, MA, 02118, United States

\*Correspondence: DA Harris: [daharris@bu.edu](mailto:daharris@bu.edu), or GL Millhauser: [glenm@ucsc.edu](mailto:glenm@ucsc.edu)

+1 617-358-4280 (phone)

+1 831 459 2176 (phone)

+1 617-358-4353 (fax)

+1 831 459 2935 (fax)

### Supporting Information

Figure S1: Representative traces from whole cell patch clamp recordings.

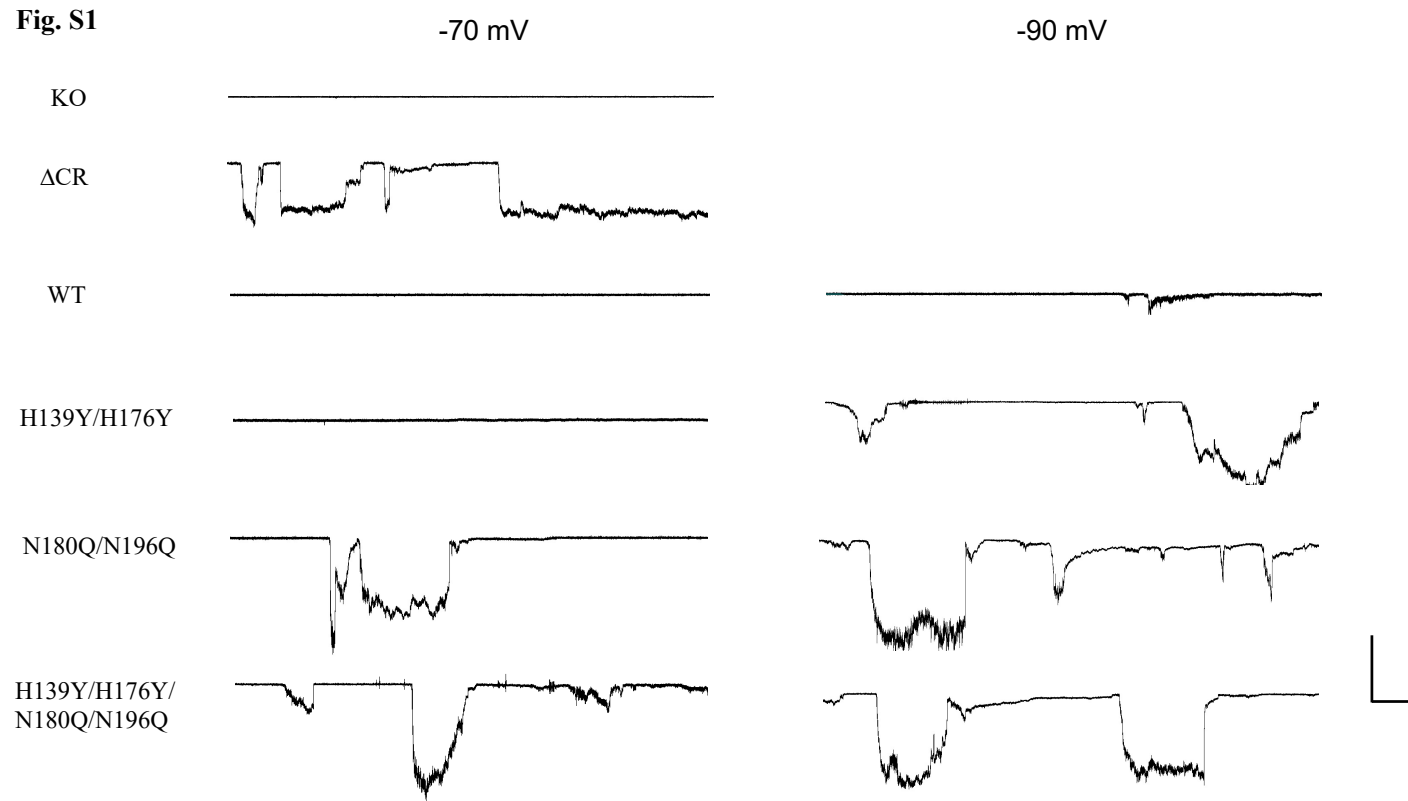

Figure S1: Representative traces of currents recorded from either untransfected N2a cells (KO) or N2a cells expressing following forms of PrP :  $\Delta$ CR, WT, H139Y/H176Y, N180Q/N196Q and H139Y/H176Y/N180Q/N196Q. Quantification of the currents is shown in figure 7. Holding potential was either -70 mV (left) or -90 mV (right). Scale bars: 1 nA, 30 s.
